# Supplementary material
Source: MDPI journal article supplement (https://www.mdpi.com/2673-5636/2/4/48)
Supplement: s1 [file s1]

**Table S1.** Model selection: results of log-likelihood ratio tests (LRTs) comparing the full-model to nested models after deletion of the random slope, and AIC comparison between fixed effects structures. Models with  $\Delta\text{AIC} < 2$  were considered equivalent, so the final model chosen (marked by \*) was the most parsimonious.

| <b>Proportion of active individuals</b>       |                                   |                  |                    |                     |
|-----------------------------------------------|-----------------------------------|------------------|--------------------|---------------------|
| Random effects                                | Dropped variable                  | Chi <sup>2</sup> | df                 | P-value             |
|                                               | Slope by species                  | 192.81           | 3                  | <b>&lt; 2.2e-16</b> |
| Fixed effects                                 | Fixed effects tested              | AIC              | $\Delta\text{AIC}$ | df                  |
|                                               | Enclosure + Month ( <i>full</i> ) | 1239.869         | 0                  | 6                   |
|                                               | Enclosure *                       | 1238.382         | 1.49               | 5                   |
|                                               | Month                             | 1237.894         | 1.98               | 5                   |
| <b>Proportion of out-of-sight individuals</b> |                                   |                  |                    |                     |
| Random effects                                | Dropped variable                  | Chi <sup>2</sup> | df                 | P-value             |
|                                               | Slope by species                  | 1159.9           | 3                  | <b>&lt; 2.2e-16</b> |
| Fixed effects                                 | Fixed effects tested              | AIC              | $\Delta\text{AIC}$ |                     |
|                                               | Enclosure + Month ( <i>full</i> ) | 2922.527         | 0                  | <b>6</b>            |
|                                               | Enclosure *                       | 2920.677         | 1.85               | <b>5</b>            |
|                                               | Month                             | 2920.738         | 1.79               | <b>5</b>            |
